# Supplementary material
Source: PubMed Central journal article supplement (PMC2684554)
Supplement: djp089_1.pdf [file djp089_1.pdf]

**Table 1.** Technical Appendix. Logistic regression modeling of first 6 years after treatment†

| Logistic regression analysis of maximum likelihood estimates |                  |    |          |                |               |          |          |
|--------------------------------------------------------------|------------------|----|----------|----------------|---------------|----------|----------|
| Parameter                                                    | Parameter Values | DF | Estimate | Standard error | Wald $\chi^2$ | P value‡ | Exp(Est) |
| Intercept                                                    |                  | 1  | -3.4924  | 0.1821         | 368.0047      | <.001    | 0.030    |
| year                                                         | 1                | 1  | 1.8672   | 0.1050         | 316.0791      | <.001    | 6.470    |
| year                                                         | 2                | 1  | 1.1328   | 0.1098         | 106.5256      | <.001    | 3.104    |
| year                                                         | 3                | 1  | 0.6956   | 0.1170         | 35.3261       | <.001    | 2.005    |
| year                                                         | 4                | 1  | 0.4624   | 0.1248         | 13.7189       | <.001    | 1.588    |
| year                                                         | 5                | 1  | 0.3218   | 0.1307         | 6.0643        | .014     | 1.380    |
| indexdx                                                      | CIN1             | 1  | -2.3549  | 0.3280         | 51.5435       | <.001    | 0.095    |
| indexdx                                                      | CIN2             | 1  | -1.3458  | 0.2969         | 20.5529       | <.001    | 0.260    |
| indextx                                                      | CONE             | 1  | -1.5957  | 0.0704         | 513.8941      | <.001    | 0.203    |
| indextx                                                      | LEEP             | 1  | -1.1512  | 0.0882         | 170.4020      | <.001    | 0.316    |
| indextx                                                      | Laser            | 1  | -0.8214  | 0.0601         | 186.7258      | <.001    | 0.440    |
| agegp                                                        | 21-29            | 1  | -0.4956  | 0.1519         | 10.6418       | .001     | 0.609    |
| agegp                                                        | 30-39            | 1  | -0.3819  | 0.1520         | 6.3122        | .012     | 0.683    |
| agegp                                                        | 40-49            | 1  | -0.0607  | 0.1624         | 0.1396        | .709     | 0.941    |
| indexdx*indextx                                              | CIN1*CONE        | 1  | 0.9135   | 0.2865         | 10.1624       | .001     | 2.493    |
| indexdx*indextx                                              | CIN1*LEEP        | 1  | 0.2756   | 0.3042         | 0.8209        | .365     | 1.317    |
| indexdx*indextx                                              | CIN1*Laser       | 1  | 0.6326   | 0.1610         | 15.4313       | <.001    | 1.883    |
| indexdx*indextx                                              | CIN2*CONE        | 1  | 0.1853   | 0.2027         | 0.8355        | .361     | 1.204    |
| indexdx*indextx                                              | CIN2*LEEP        | 1  | -0.0690  | 0.1917         | 0.1295        | .719     | 0.933    |
| indexdx*indextx                                              | CIN2*Laser       | 1  | 0.1765   | 0.1074         | 2.7006        | .100     | 1.193    |
| indexdx*agegp                                                | CIN1*Agegp 21-29 | 1  | 0.7286   | 0.3391         | 4.6184        | .032     | 2.072    |
| indexdx*agegp                                                | CIN1*Agegp 30-39 | 1  | 0.7802   | 0.3405         | 5.2519        | .022     | 2.182    |
| indexdx*agegp                                                | CIN1*Agegp 40-49 | 1  | 0.4225   | 0.3563         | 1.4059        | .236     | 1.526    |
| indexdx*agegp                                                | CIN2*Agegp 21-29 | 1  | 0.6654   | 0.2992         | 4.9467        | .026     | 1.945    |
| indexdx*agegp                                                | CIN2*Agegp 30-39 | 1  | 0.5576   | 0.3015         | 3.4213        | .064     | 1.747    |
| indexdx*agegp                                                | CIN2*Agegp 40-49 | 1  | 0.2563   | 0.3200         | 0.6417        | .423     | 1.292    |

Using forward selection, effects were

†Abbreviations: indextx = index treatment;

entered into the model in the following order: intercept, year, indextx, indexdx, agegp, indexdx\*indextx, indexdx\*agegp.

indexdx = index diagnosis; agegp = age at index treatment, categorized into 10-year age groups; year = year since index treatment; Exp (Est) = **exponential of the estimate**; CIN = cervical intraepithelial neoplasia.

‡P values were calculated with a two-sided  $\chi^2$  test.
